# Supplementary material for: Green synthesis of nanobelt-membrane hybrid structured vanadium oxide with high electrochromic contrast
Source: Royal Society of Chemistry journal article supplement (doi:10.1039/c4tc00158c), 2014-03-19
Supplement: c4tc00158c1.pdf [file c4tc00158c1.pdf]

## Green synthesis of nanobelt-membrane hybrid structured vanadium oxide with high electrochromic contrast

Wenbin Kang, Chaoyi Yan, Xu Wang, Ce Yao Foo, Alvin Wei Ming Tan, Kenji Jian Zhi Chee, Pooi See Lee\*

*School of Material Science and Engineering, Nanyang Technological University, 50 Nanyang Avenue, Singapore 639798*

*Email: pslee@ntu.edu.sg*

### Sample preparation

After the hydrothermal synthesis and centrifuge washing, the whole final product is mixed with 50 ml DI water. Based on the amount of precursor used and final product composition as determined by the XRD data, the  $V_2O_5$  hydrate forms a 0.2 wt% suspension. The suspension is bath-sonicated and drop-casted onto an ITO glass covering a  $7 \times 35 \text{ mm}^2$  area.

To investigate the thickness, the film is drop-casted in the same way described above onto a regular glass covering the same area to maintain the film thickness. As can be seen below in the cross sectional image, the film is around 712 nm thick.

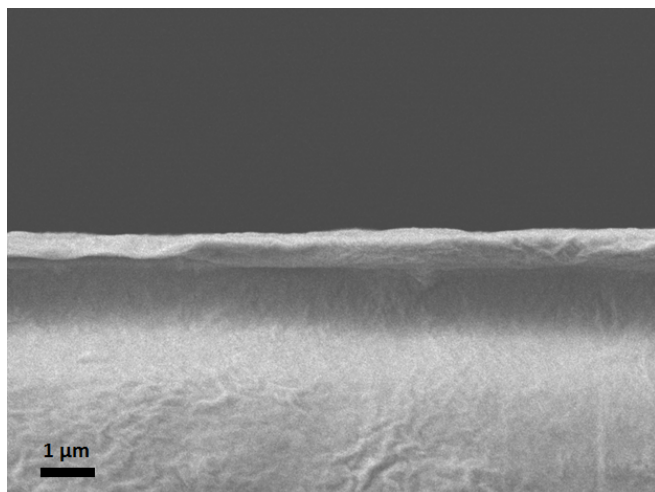

**FS1.** Cross sectional FESEM image of the drop-casted film.

## Characterization

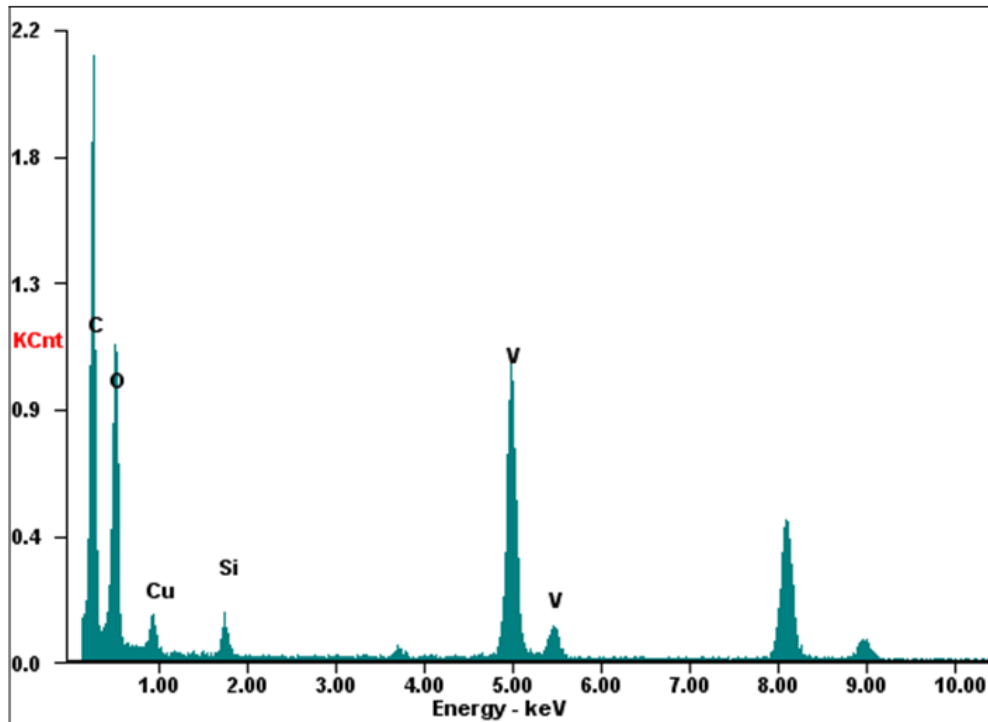

**FS 2.** EDX spectrum of the hybrid structured vanadium oxide

The wt% of V and O is 51.6 and 48.4 % respectively, which corresponds to atom percent of V and O 25.1, 74.9 % respectively.

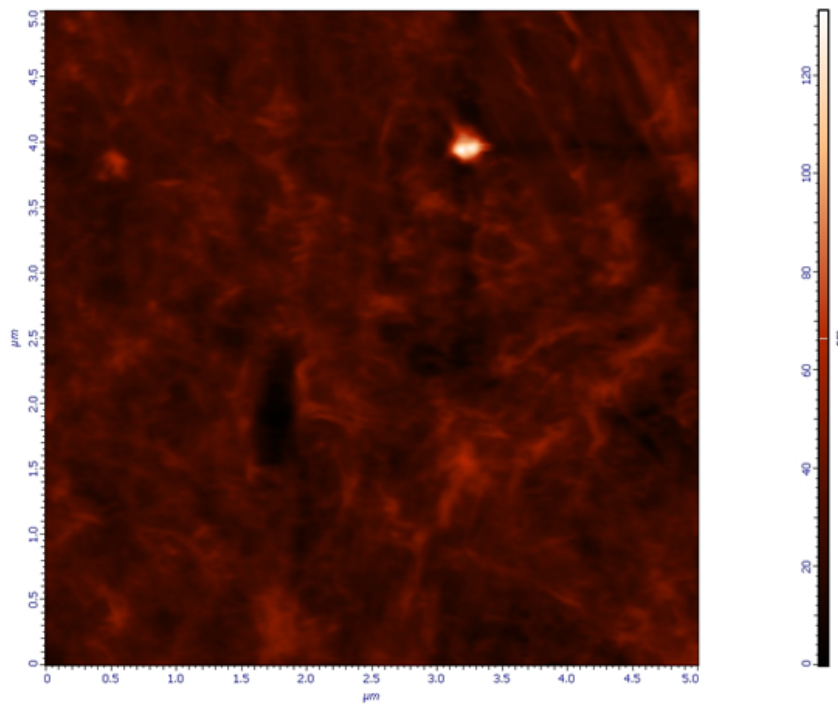

**FS 3.** AFM image of a 5 by 5  $\mu\text{m}$  region for RMS testing, which suggests a very smooth surface with RMS of 7.72 nm.

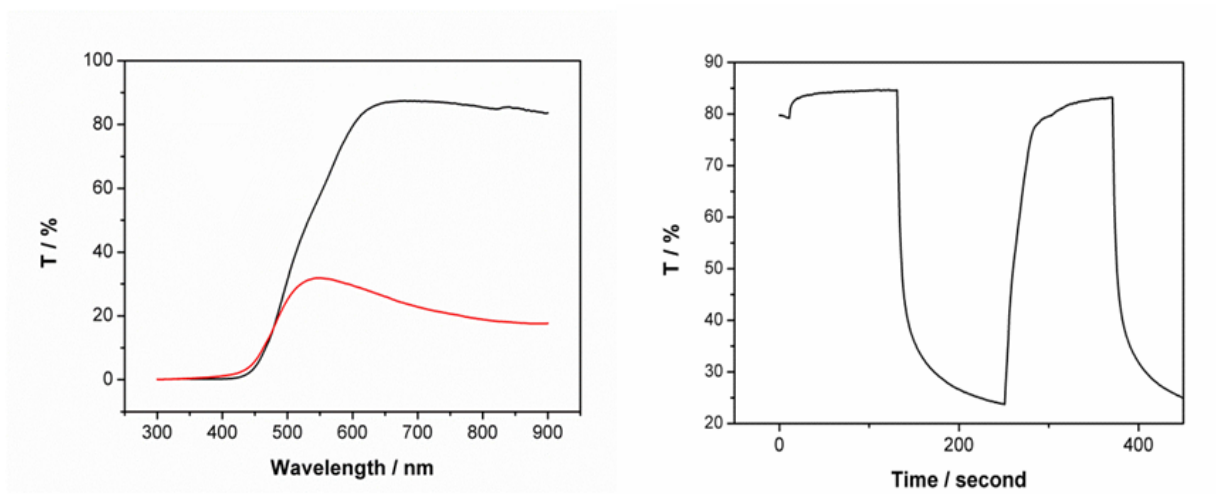

**FS 4.** Electrochromic contrast and switching test under two electrode condition. The film is polarized between -2.0 V and +2.8 V in LiClO<sub>4</sub> electrolyte. The contrast obtained at 700 nm is 64%.  $T_{\text{bleaching}}$  and  $T_{\text{coloring}}$  measurement takes the same standard as described before, which leads to  $T_{\text{bleaching}} = 32.5$  s and  $T_{\text{coloring}} = 46.6$  s
